# Supplementary material for: Cas-based bacterial detection: recent advances and perspectives
Source: Royal Society of Chemistry journal article supplement (doi:10.1039/d3an02120c), 2024-01-01

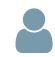[Log in](#)[Register](#)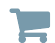[Cart](#)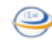

## Emerging Microbes & Infections >

Volume 8, 2019 - Issue 1

Open access

13,989 | 111

Views

CrossRef citations to date

33

Altmetric

Original Articles

# CRISPR-based rapid and ultra-sensitive diagnostic test for Mycobacterium tuberculosis

Jing-Wen Ai, Xian Zhou, Teng Xu, Minling Yang, Yuanyuan Chen, Gui-Qing He, ...[show all](#)

Pages 1361-1369 | Received 30 Apr 2019, Accepted 27 Aug 2019, Published online: 15 Sep 2019

Cite this article

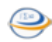<https://doi.org/10.1080/22221751.2019.1664939>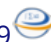

Check for updates

Full Article

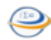

Figures &amp; data

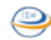

References

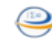

Supplemental

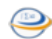

Citations

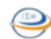

Metrics

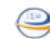

Licensing

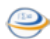

Reprints &amp; Permissions

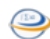

View PDF

View EPUB

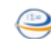

## Reprints and Permissions

This is an open access article distributed under the terms of the Creative Commons CC BY license, which permits unrestricted use, distribution, reproduction in any medium, provided the original work is properly cited.

You are not required to obtain permission to reuse this article in part or whole.

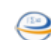

Supplement: d3an02120c1.zip [file d3an02120c1.zip]
