# Supplementary material for: Cas-based bacterial detection: recent advances and perspectives
Source: Royal Society of Chemistry journal article supplement (doi:10.1039/d3an02120c), 2024-01-01
Supplement: d3an02120c1.zip [file d3an02120c1.zip]

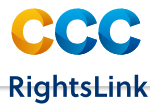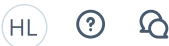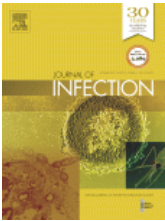

**TB-QUICK: CRISPR-Cas12b-assisted rapid and sensitive detection of Mycobacterium tuberculosis**

**Author:**  
I Kuan Sam,Ying-ying Chen,Jun Ma,Shi-yuan Li,Ruo-yan Ying,Lin-xian Li,Ping Ji,Shu-jun Wang,Jie Xu,Yu-jie Bao,Guo-ping Zhao,Hua-jun Zheng,Jin Wang,Wei Sha,Ying Wang

**Publication:** Journal of Infection

**Publisher:** Elsevier

**Date:** July 2021

© 2021 The British Infection Association. Published by Elsevier Ltd. All rights reserved.

**Order Completed**

Thank you for your order.

This Agreement between Mr. huatao lan ("You") and Elsevier ("Elsevier") consists of your license details and the terms and conditions provided by Elsevier and Copyright Clearance Center.

Your confirmation email will contain your order number for future reference.

|                |               |                                   |
|----------------|---------------|-----------------------------------|
| License Number | 5683941181269 | <a href="#">Printable Details</a> |
| License date   | Dec 07, 2023  |                                   |

**Licensed Content**

|                              |                                                                                                                                                                     |
|------------------------------|---------------------------------------------------------------------------------------------------------------------------------------------------------------------|
| Licensed Content Publisher   | Elsevier                                                                                                                                                            |
| Licensed Content Publication | Journal of Infection                                                                                                                                                |
| Licensed Content Title       | TB-QUICK: CRISPR-Cas12b-assisted rapid and sensitive detection of Mycobacterium tuberculosis                                                                        |
| Licensed Content Author      | I Kuan Sam,Ying-ying Chen,Jun Ma,Shi-yuan Li,Ruo-yan Ying,Lin-xian Li,Ping Ji,Shu-jun Wang,Jie Xu,Yu-jie Bao,Guo-ping Zhao,Hua-jun Zheng,Jin Wang,Wei Sha,Ying Wang |
| Licensed Content Date        | Jul 1, 2021                                                                                                                                                         |
| Licensed Content Volume      | 83                                                                                                                                                                  |
| Licensed Content Issue       | 1                                                                                                                                                                   |
| Licensed Content Pages       | 7                                                                                                                                                                   |

**Order Details**

|                                              |                                     |
|----------------------------------------------|-------------------------------------|
| Type of Use                                  | reuse in a journal/magazine         |
| Requestor type                               | non-commercial company (non-profit) |
| Portion                                      | figures/tables/illustrations        |
| Number of figures/tables/illustrations       | 1                                   |
| Format                                       | electronic                          |
| Are you the author of this Elsevier article? | No                                  |
| Will you be translating?                     | No                                  |

**About Your Work**

|                           |                                                                |
|---------------------------|----------------------------------------------------------------|
| Title of new article      | Cas-based bacteria detection: Recent advances and perspectives |
| Lead author               | huatao lan                                                     |
| Title of targeted journal | Analyst                                                        |
| Publisher                 | American Chemical Society                                      |
| Expected publication date | Jan 2024                                                       |

**Additional Data**

|          |             |
|----------|-------------|
| Portions | Figures 3 f |
|----------|-------------|

Requestor Location

Mr. huatao Lan

Guangdong Medical University, Dongguan

Requestor Location

Dongguan, 523808

China

Attn: Mr. huatao Lan

Tax Details

Publisher Tax ID

GB 494 6272 12

Total: 0.00 USD

CLOSE WINDOW

ORDER MORE
