# Supplementary material for: Cas-based bacterial detection: recent advances and perspectives
Source: Royal Society of Chemistry journal article supplement (doi:10.1039/d3an02120c), 2024-01-01
Supplement: d3an02120c1.zip [file d3an02120c1.zip]

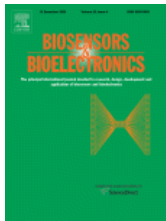

A facile, rapid and sensitive detection of MRSA using a CRISPR-mediated DNA FISH method, antibody-like dCas9/sgRNA complex

**Author:** Kyeonghye Guk,Joo Oak Keem,Seul Gee Hwang,Hyeran Kim,Taejoon Kang,Eun-Kyung Lim,Juyeon Jung  
**Publication:** Biosensors and Bioelectronics  
**Publisher:** Elsevier  
**Date:** 15 September 2017

© 2017 Elsevier B.V. All rights reserved.

Order Completed

Thank you for your order.

This Agreement between Mr. huatao Lan ("You") and Elsevier ("Elsevier") consists of your license details and the terms and conditions provided by Elsevier and Copyright Clearance Center.

Your confirmation email will contain your order number for future reference.

License Number 5683921271488

[Printable Details](#)

License date Dec 07, 2023

Licensed Content

|                              |                                                                                                                            |
|------------------------------|----------------------------------------------------------------------------------------------------------------------------|
| Licensed Content Publisher   | Elsevier                                                                                                                   |
| Licensed Content Publication | Biosensors and Bioelectronics                                                                                              |
| Licensed Content Title       | A facile, rapid and sensitive detection of MRSA using a CRISPR-mediated DNA FISH method, antibody-like dCas9/sgRNA complex |
| Licensed Content Author      | Kyeonghye Guk,Joo Oak Keem,Seul Gee Hwang,Hyeran Kim,Taejoon Kang,Eun-Kyung Lim,Juyeon Jung                                |
| Licensed Content Date        | Sep 15, 2017                                                                                                               |
| Licensed Content Volume      | 95                                                                                                                         |
| Licensed Content Issue       | n/a                                                                                                                        |
| Licensed Content Pages       | 5                                                                                                                          |

Order Details

|                                              |                                     |
|----------------------------------------------|-------------------------------------|
| Type of Use                                  | reuse in a journal/magazine         |
| Requestor type                               | non-commercial company (non-profit) |
| Portion                                      | figures/tables/illustrations        |
| Number of figures/tables/illustrations       | 1                                   |
| Format                                       | electronic                          |
| Are you the author of this Elsevier article? | No                                  |
| Will you be translating?                     | No                                  |

About Your Work

|                           |                                                                |
|---------------------------|----------------------------------------------------------------|
| Title of new article      | Cas-based bacteria detection: Recent advances and perspectives |
| Lead author               | huatao lan                                                     |
| Title of targeted journal | Analyst                                                        |
| Publisher                 | American Chemical Society                                      |
| Expected publication date | Jan 2024                                                       |

Additional Data

|          |             |
|----------|-------------|
| Portions | Figures 2 d |
|----------|-------------|

Requestor Location

Mr. huatao Lan

Guangdong Medical University, Dongguan

Requestor Location

Dongguan, 523808

China

Attn: Mr. huatao Lan

Tax Details

Publisher Tax ID

GB 494 6272 12

Total: 0.00 USD

CLOSE WINDOW

ORDER MORE
