# Supplementary material for: Cas-based bacterial detection: recent advances and perspectives
Source: Royal Society of Chemistry journal article supplement (doi:10.1039/d3an02120c), 2024-01-01
Supplement: d3an02120c1.zip [file d3an02120c1.zip]

As a library, NLM provides access to scientific literature. Inclusion in an NLM database does not imply endorsement of, or agreement with, the contents by NLM or the National Institutes of Health.

Learn more: [PMC Disclaimer](#) | [PMC Copyright Notice](#)

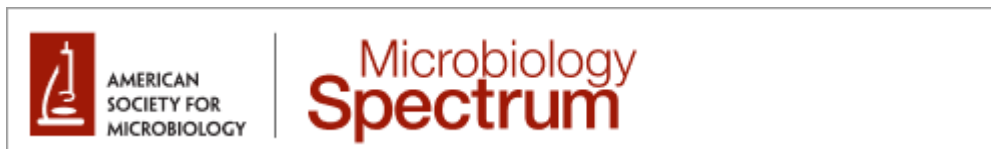

[Microbiol Spectr.](#) 2023 Mar-Apr; 11(2): e04870-22.

PMCID: PMC10100783

Published online 2023 Mar 21. doi: [10.1128/spectrum.04870-22](https://doi.org/10.1128/spectrum.04870-22)

PMID: [36943040](https://pubmed.ncbi.nlm.nih.gov/36943040/)

## Cas12a/Guide RNA-Based Platforms for Rapidly and Accurately Identifying *Staphylococcus aureus* and Methicillin-Resistant *S. aureus*

[Xiaoying Cao](#),<sup>#a</sup> [Yanbin Chang](#),<sup>#b</sup> [Chunqing Tao](#),<sup>a</sup> [Sen Chen](#),<sup>a</sup> [Qiuxia Lin](#),<sup>c</sup> [Chao Ling](#),<sup>c</sup> [Shifeng Huang](#),<sup>xc</sup> and [Hengshu Zhang](#),<sup>xa</sup>

Artem S. Rogovskyy, Editor

Artem S. Rogovskyy, Texas A&M University;

[Copyright](#) © 2023 Cao et al.

This is an open-access article distributed under the terms of the [Creative Commons Attribution 4.0 International license](#).

### ABSTRACT

In order to ensure the prevention and control of methicillin-resistant *Staphylococcus aureus* (MRSA) infection, rapid and accurate detection of pathogens and their resistance phenotypes is a must. Therefore, this study aimed to develop a fast and precise nucleic acid detection platform for identifying *S. aureus* and MRSA. We initially constructed a CRISPR-Cas12a detection system by designing single guide RNAs (sgRNAs) specifically targeting the thermonuclease (*nuc*) and *mecA* genes. To increase the sensitivity of the CRISPR-Cas12a system, we incorporated PCR, loop-mediated isothermal amplification (LAMP), and recombinase polymerase amplification (RPA). Subsequently, we compared the sensitivity and specificity of the three amplification methods paired with the CRISPR-Cas12a system. Finally, the clinical performance of the methods was tested by analyzing the fluorescence readout of 111 clinical isolates. In order to visualize the results, lateral-flow test strip technology, which enables point-of-care testing, was also utilized. After comparing the sensitivity and specificity of three different methods, we determined that the *nuc*-LAMP-Cas12a and *mecA*-LAMP-Cas12a methods were the optimal detection methods. The *nuc*-LAMP-Cas12a platform showed a limit of detection (LOD) of 10 aM (~6 copies  $\mu\text{L}^{-1}$ ), while the *mecA*-LAMP-Cas12a platform demonstrated a LOD of 1 aM (~1 c  $\mu\text{L}^{-1}$ ). The LOD of both platforms reached  $4 \times 10^3$  fg/ $\mu\text{L}$  of genomic DNA. Critical evaluation of their efficiencies on 111 clinical bacterial isolates showed that they were 100% specific and 100% sensitive with both the fluorescence readout and the lateral-flow readout. Total d

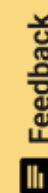

[Back to Top](#)
