# Supplementary material for: Cas-based bacterial detection: recent advances and perspectives
Source: Royal Society of Chemistry journal article supplement (doi:10.1039/d3an02120c), 2024-01-01
Supplement: d3an02120c1.zip [file d3an02120c1.zip]

As a library, NLM provides access to scientific literature. Inclusion in an NLM database does not imply endorsement of, or agreement with, the contents by NLM or the National Institutes of Health.

Learn more: [PMC Disclaimer](#) | [PMC Copyright Notice](#)

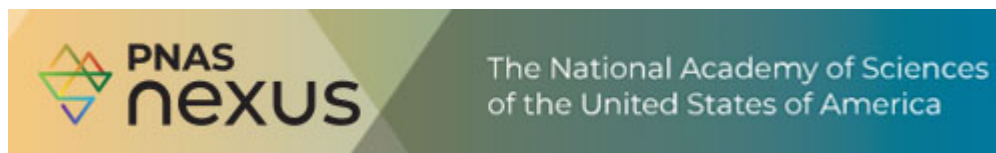

[PNAS Nexus](#). 2022 Mar; 1(1): pgac021.

PMCID: PMC9013781

Published online 2022 Apr 15. doi: [10.1093/pnasnexus/pgac021](https://doi.org/10.1093/pnasnexus/pgac021)

PMID: [35450424](https://pubmed.ncbi.nlm.nih.gov/35450424/)

## Multiplexed detection of bacterial nucleic acids using Cas13 in droplet microarrays

[Sri Gowtham Thakku](#), [Cheri M Ackerman](#), [Cameron Myhrvold](#), [Roby P Bhattacharyya](#), [Jonathan Livny](#), [Peijun Ma](#), [Giselle Isabella Gomez](#), [Pardis C Sabeti](#), [Paul C Blainey](#), and [Deborah T Hung](#)<sup>✉</sup>

Bruce Levine, Editor

[Copyright](#) © The Author(s) 2022. Published by Oxford University Press on behalf of the National Academy of Sciences.

This is an Open Access article distributed under the terms of the Creative Commons Attribution License (<https://creativecommons.org/licenses/by/4.0/>), which permits unrestricted reuse, distribution, and reproduction in any medium, provided the original work is properly cited.

### Abstract

Rapid and accurate diagnosis of infections is fundamental to individual patient care and public health management. Nucleic acid detection methods are critical to this effort, but are limited either in the breadth of pathogens targeted or by the expertise and infrastructure required. We present here a high-throughput system that enables rapid identification of bacterial pathogens, bCARMEN, which utilizes: (1) modular CRISPR-Cas13-based nucleic acid detection with enhanced sensitivity and specificity; and (2) a droplet microfluidic system that enables thousands of simultaneous, spatially multiplexed detection reactions at nanoliter volumes; and (3) a novel preamplification strategy that further enhances sensitivity and specificity. We demonstrate bCARMEN is capable of detecting and discriminating 52 clinically relevant bacterial species and several key antibiotic resistance genes. We further develop a simple proof of principle workflow using stabilized reagents and cell phone camera optical readout, opening up the possibility of a rapid point-of-care multiplexed bacterial pathogen identification and antibiotic susceptibility testing.

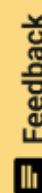

### Significance Statement

[Back to Top](#)
