# Supplementary material for: Cas-based bacterial detection: recent advances and perspectives
Source: Royal Society of Chemistry journal article supplement (doi:10.1039/d3an02120c), 2024-01-01
Supplement: d3an02120c1.zip [file d3an02120c1.zip]

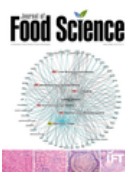

## Sensitive detection of foodborne pathogens based on CRISPR-Cas13a

Author: Song Gao, Jingwen Liu, Zhiyong Li, et al

Publication: Journal of Food Science

Publisher: John Wiley and Sons

Date: Apr 30, 2021

© 2021 Institute of Food Technologists®

### Order Completed

Thank you for your order.

This Agreement between Mr. huatao Lan ("You") and John Wiley and Sons ("John Wiley and Sons") consists of your license details and the terms and conditions provided by John Wiley and Sons and Copyright Clearance Center.

Your confirmation email will contain your order number for future reference.

License Number 5683920782229

[Printable Details](#)

License date Dec 07, 2023

#### Licensed Content

|                              |                                                                   |
|------------------------------|-------------------------------------------------------------------|
| Licensed Content Publisher   | John Wiley and Sons                                               |
| Licensed Content Publication | Journal of Food Science                                           |
| Licensed Content Title       | Sensitive detection of foodborne pathogens based on CRISPR-Cas13a |
| Licensed Content Author      | Song Gao, Jingwen Liu, Zhiyong Li, et al                          |
| Licensed Content Date        | Apr 30, 2021                                                      |
| Licensed Content Volume      | 86                                                                |
| Licensed Content Issue       | 6                                                                 |
| Licensed Content Pages       | 11                                                                |

#### Order Details

|                                                                                            |                     |
|--------------------------------------------------------------------------------------------|---------------------|
| Type of use                                                                                | Journal/Magazine    |
| Requestor type                                                                             | University/Academic |
| Is the reuse sponsored by or associated with a pharmaceutical or medical products company? | no                  |
| Format                                                                                     | Electronic          |
| Portion                                                                                    | Figure/table        |
| Number of figures/tables                                                                   | 1                   |
| Will you be translating?                                                                   | No                  |
| Circulation                                                                                | 1 - 29              |

#### About Your Work

|                           |                                                                |
|---------------------------|----------------------------------------------------------------|
| Title of new article      | Cas-based bacteria detection: Recent advances and perspectives |
| Lead author               | huatao lan                                                     |
| Title of targeted journal | Analyst                                                        |
| Publisher                 | American Chemical Society                                      |
| Expected publication date | Jan 2024                                                       |

#### Additional Data

|          |             |
|----------|-------------|
| Portions | Figures 4 a |
|----------|-------------|

#### Requestor Location

|                    |                                                                                                               |
|--------------------|---------------------------------------------------------------------------------------------------------------|
| Requestor Location | Mr. huatao Lan<br>Guangdong Medical University, Dongguan<br>Dongguan, 523808<br>China<br>Attn: Mr. huatao Lan |
|--------------------|---------------------------------------------------------------------------------------------------------------|

#### Tax Details

|                  |             |
|------------------|-------------|
| Publisher Tax ID | EU826007151 |
|------------------|-------------|

Would you like to purchase the full text of this article? If so, please continue on to the content ordering system located here: [Purchase PDF](#)  
If you click on the buttons below or close this window, you will not be able to return to the content ordering system.

Total: 0.00 USD

CLOSE WINDOW

ORDER MORE

© 2023 Copyright - All Rights Reserved | [Copyright Clearance Center, Inc.](#) | [Privacy statement](#) | [Data Security and Privacy](#)  
| [For California Residents](#) | [Terms and Conditions](#)Comments? We would like to hear from you. E-mail us at [customercare@copyright.com](mailto:customercare@copyright.com)
